# Supplementary material for: Photoinduced decoration of NiO nanosheets/Ni foam with Pd nanoparticles towards a carbon-free and self-standing cathode for a lithium–oxygen battery with a low overpotential and long cycle life
Source: Royal Society of Chemistry journal article supplement (doi:10.1039/c7mh01014a), 2018-01-01
Supplement: c7mh01014a1.pdf [file c7mh01014a1.pdf]

## **Supporting Information**

**Photoinduced decoration of NiO nanosheets/Ni foam with Pd Nanoparticles  
towards carbon-free and self-standing cathode for lithium-oxygen battery  
with low overpotential and long cycle life**

## Methods

### Chemicals and materials:

$\text{Ni}(\text{NO}_3)_2 \cdot 6\text{H}_2\text{O}$ ,  $\text{Na}_2\text{PdCl}_4$ , TEGDME and  $\text{LiCF}_3\text{SO}_3$  were purchased from Aladdin Reagent.

**Pd/NiO nanosheets @Ni foam cathode preparation.** The synthesis procedure for the Pd/NiO@Ni foam cathode was described by Vijay et al with a slight modification. In a typical process, 50 ml of an aqueous 0.15 M  $\text{Ni}(\text{NO}_3)_2 \cdot 6\text{H}_2\text{O}$  solution was obtained by dissolving an appropriate amount of  $\text{Ni}(\text{NO}_3)_2 \cdot 6\text{H}_2\text{O}$  into 50 ml of DI water and stirring it for 30 min. The three-electrode system consisting of NF as the working electrode, platinum foil as the counter electrode, and silver/silver chloride (Ag/AgCl) as the reference electrode was used to deposit the  $\text{Ni}(\text{OH})_2$  nanostructure on NF. Potentiodynamic electrodeposition mode was employed within the potential window of 0 to 1.1 V (vs. Ag/AgCl) at a  $20 \text{ mV s}^{-1}$  scan rate for 30 cycles.

After deposition, the  $\text{Ni}(\text{OH})_2$  electrodes were washed several times with DI water and dried at room temperature. Furthermore,  $\text{Ni}(\text{OH})_2$  electrodes were calcined at 473 K for 2 h to obtain NiO. Next, the obtained NiO@Ni foam cathode was directly immersed into  $\text{Na}_2\text{PdCl}_4$  aqueous solution (5 mM) and exposed to light for 30 min. The cathode was finally rinsed with deionized water several times and dried in an air oven at  $60^\circ\text{C}$ . The active mass of each electrodeposited NiO electrode was estimated by calculating the weight difference between the pristine Ni foam and NiO@Ni foam cathode.

**NiO nanosheet@Ni foam cathode preparation.** The NiO@Ni foam cathode was fabricated with the same procedure as Pd/NiO@Ni foam cathode without the step of further photoreduction.

**Pd/NiO film@Ni foam cathode preparation.** The Pd/NiO film @Ni foam cathode was prepared with the following steps. First, the Ni foam was annealed in air at  $350^\circ\text{C}$  for 2h to

obtain NiO film covering on the surface of Ni foam. Then, the obtained NiO film @Ni foam cathode was directly immersed into Na<sub>2</sub>PdCl<sub>4</sub> aqueous solution (5 mM) and exposed to light for 30 min.

**Characterization.** The morphologies and structures of materials were analysed with various physiochemical techniques, including PXRD, field emission scanning electron microscopy (SEM), TEM, nitrogen adsorption/desorption isotherms. The reaction products were characterized with SEM.

**Li-O<sub>2</sub> cell preparation and electrochemical measurements.** The electrochemical performance of the Li-O<sub>2</sub> cell was tested in a 2025-type coin cell. All of the cells were assembled in a glove box under an Ar atmosphere with a lithium metal foil anode, a glass fiber separator, an oxygen cathode and an electrolyte containing 1 M LiCF<sub>3</sub>SO<sub>3</sub> in TEGDME. The Pd/NiO@Ni foam cathode, were used directly without any polymer binder. The electrochemical performances of the Pd/NiO @Ni foam cathodes were tested in a specific capacity-controlled mode under various current densities. The electrochemical impedance spectroscopy of the cell was evaluated using a BioLogic VMP3 electrochemical workstation within a frequency range of 10<sup>6</sup> to 10<sup>-2</sup> Hz. LSV with a scan rate of 0.02 mV s<sup>-1</sup> was also performed in the range of 2.0–3.0 V.

**Instrumentation.** PXRD measurements were performed on a Rigaku-MiniFlex600 power X-ray diffractometer with Cu K $\alpha$  radiation. SEM was performed on a field emission Hitachi S-4800 instrument operating at an accelerating voltage of 10 kV. TEM was performed using an FEI Tecnai G2 S-Twin transmission electron microscope with a field emission gun operating at 200 kV. Nitrogen adsorption measurements were performed on a Micromeritics ASAP 2020 adsorption analyser. Specific surface areas were calculated by the Brunauer–Emmert–Teller method. Pore volumes and sizes were estimated from the pore-size distribution curves from the adsorption isotherms using the Barrett–Joyner–Halenda method. Li-O<sub>2</sub> cell were

tested on a LAND CT2001A multi-channel battery testing system. Electrochemical impedance spectroscopy and LSV were performed on a BioLogic VMP3 electrochemical workstation. A xenon light source (PLS-SXE300C) was employed for the photochemical deposition of Pd nanoparticles.

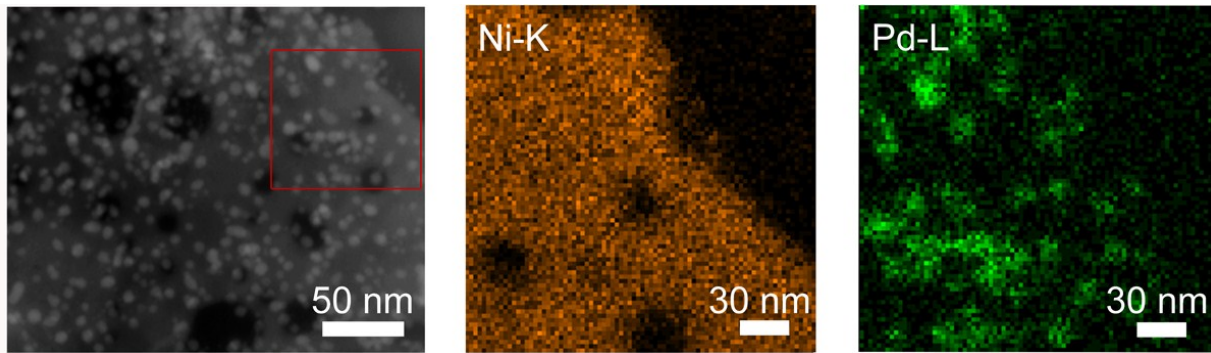

**Figure S1.** TEM mapping images. TEM image of PNS cathode and the corresponding elemental mapping images of Ni and Pd.

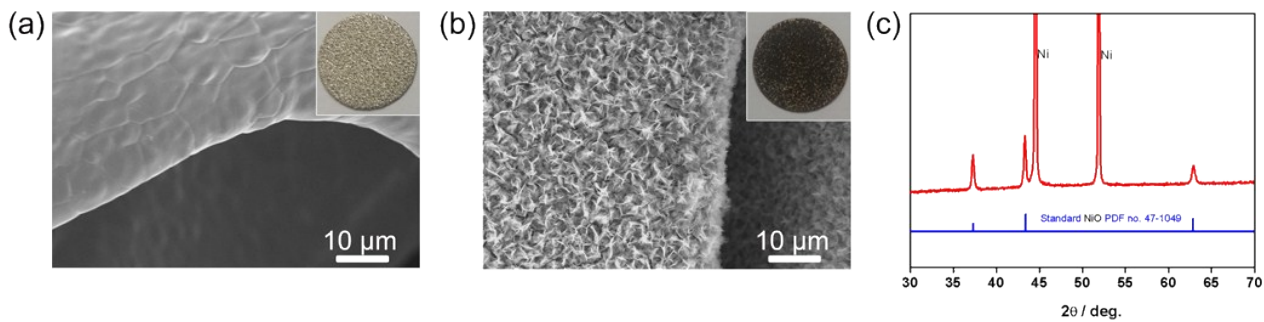

**Figure S2.** (a) SEM image and photograph (inset) of pristine Ni foam. (b) SEM image and photograph (inset) of NiO nanosheets grown on the Ni foam. (c) X-ray diffraction patterns of the NiO nanosheets grown on the Ni foam cathode. The patterns for standard NiO are also shown for reference.

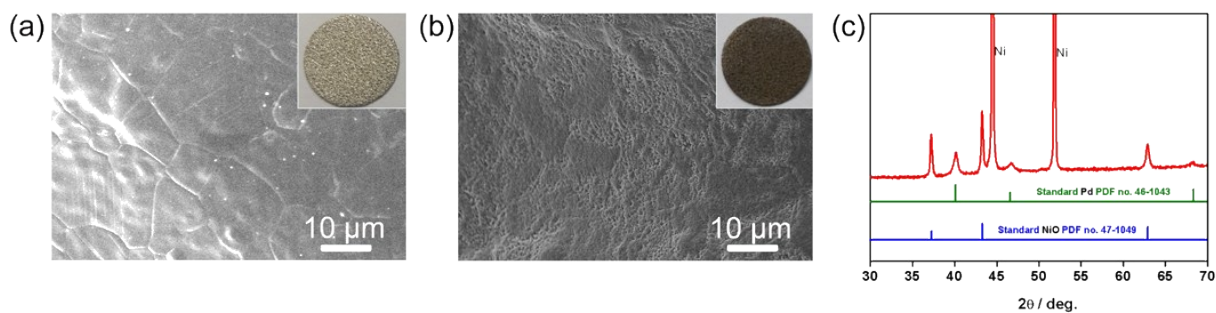

**Figure S3.** (a) SEM image and photograph (inset) of pristine Ni foam. (b) SEM image and photograph (inset) of Pd nanoparticles modified NiO film grown on the Ni foam. (c) X-ray diffraction patterns of Pd nanoparticles modified NiO film grown on the Ni foam cathode. The patterns for standard NiO and Pd are also shown for reference.

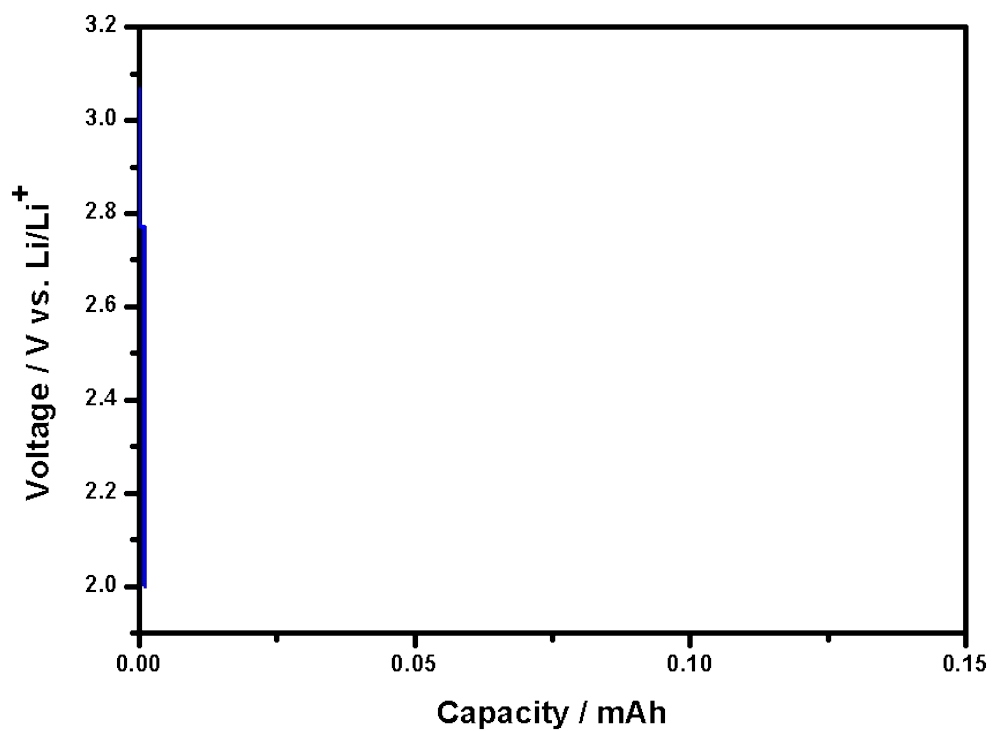

**Figure S4.** The discharge performance of lithium-oxygen (Li-O<sub>2</sub>) cell with PNS cathode in Ar.



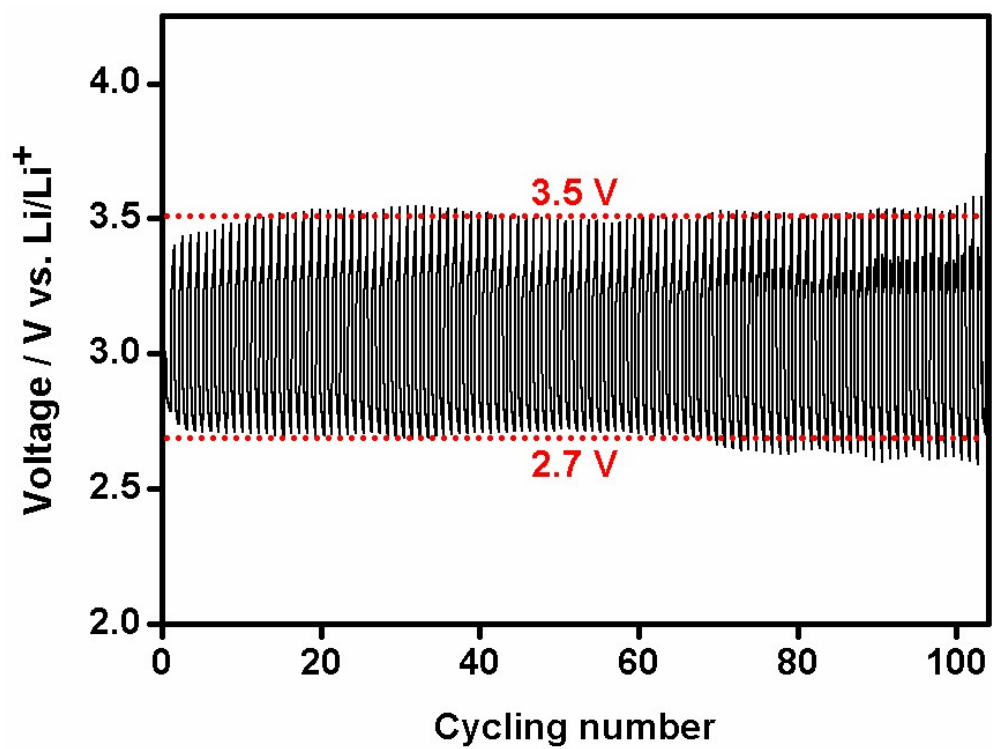

**Figure S5.** Discharge-charge profiles of the PNS cathode with a fixed capacity of 1000 mAh  $g_{Pd}^{-1}$  at 200 mA  $g_{Pd}^{-1}$ .

**Table S1. Composition of Pd/NiO.** The Pd content of Pd/NiO was verified to be 1.55 at.% by inductively coupled plasma optical emission spectrometry (ICP-OES).

| <b>No.</b> | <b>Ni/ppm</b> | <b>Pd/ppm</b> | <b>Ni+Pd/ppm</b> | <b>Pd/Ni+Pd</b> |
|------------|---------------|---------------|------------------|-----------------|
| <b>1#</b>  | 465400        | 7312          | 472712           | 0.0155          |
